1 **The mitochondrial copper chaperone COX11 plays an**  
2 **auxiliary role in the defence against oxidative stress**

3

4 **Ivan Radin<sup>1\*,#a</sup>, Uta Gey<sup>1</sup>, Luise Kost<sup>1</sup>, Iris Steinebrunner<sup>2</sup>, Gerhard Rödel<sup>1\*</sup>**

5 <sup>1</sup>Institute for Genetics, Technische Universität Dresden, Dresden, Germany.

6 <sup>2</sup>Department of Biology, Technische Universität Dresden, Dresden, Germany.

7

8 <sup>#a</sup> Current address: Department of Biology, Washington University in St. Louis, St. Louis,

9 USA.

10 \*Corresponding authors:

11 E-mail: [iradin@wustl.edu](mailto:iradin@wustl.edu) (IR) and [gerhard.roedel@tu-dresden.de](mailto:gerhard.roedel@tu-dresden.de) (GR)

12

13 Short title: COX11 is involved in oxidative stress response

14

15

16

17

18

19

20

21

22

23

## 24 **Abstract**

25 COX11, a protein anchored in the inner mitochondrial membrane, was originally  
26 identified as a copper chaperone delivering  $\text{Cu}^+$  to the cytochrome *c* oxidase of the  
27 respiratory chain. Here, we present evidence that this protein is also involved in the  
28 defence against reactive oxygen species. Quantitative PCR analyses in the model plant  
29 *Arabidopsis thaliana* revealed that the level of *AtCOX11* mRNA rises under oxidative  
30 stress. The unexpected result that *AtCOX11* knock-down lines contained less ROS than  
31 the wild-type can possibly be explained by the impaired oxidative phosphorylation,  
32 resulting in less respiration-dependent ROS formation. Similarly, we observed that yeast  
33 *Saccharomyces cerevisiae* *ScCOX11* null mutants produced less ROS than wild-type  
34 cells. However, when exposed to oxidative stress, yeast strains overexpressing  
35 *ScCOX11* or *AtCOX11* showed lower ROS levels compared with the control indicating a  
36 ROS-detoxifying effect of the COX11 proteins. The additive effect on ROS sensitivity  
37 upon deletion of *ScCOX11* in addition to the known ROS scavenger gene *SOD1* encoding  
38 superoxide dismutase 1 corroborates the oxidative stress-relieving function of *ScCOX11*.  
39 Moreover, yeast strains overexpressing soluble versions of either *AtCOX11* or *ScCOX11*  
40 became more resistant against oxidative stress. The importance of three conserved  
41 cysteines for the ROS scavenger function became apparent after their deletion that  
42 resulted in the loss of ROS resistance. Further studies of strains producing COX11  
43 proteins with individually mutated cysteines indicate that the formation of disulphide  
44 bridges might be the underlying mechanism responsible for the antioxidative activity of  
45 COX11 proteins. Both *AtCOX11* and *ScCOX11* apparently partake in oxidative stress  
46 defence by directly or indirectly exploiting the redox capacity of their cysteine residues.

47

## 48 **Introduction**

49 For many organisms, aerobic cellular respiration is an essential process, which  
50 converts chemical energy stored in sugars and other metabolites into ATP. This complex  
51 process is completed by the mitochondrial electron transport chain which shuttles  
52 electrons from NAD(P)H and succinate to the terminal acceptor, molecular oxygen [1].  
53 During this process some electrons escape and reduce molecular oxygen, generating  
54 superoxide, which can subsequently be converted into other reactive oxygen species  
55 (ROS) [2]. While respiratory complexes represent a major source of ROS in mitochondria,  
56 several other redox reactions also contribute to ROS production [3]. It is estimated that  
57 1-5% of molecular oxygen is converted to ROS [4].

58 ROS molecules are highly reactive and can oxidize and thereby damage other  
59 molecules such as lipids, proteins, and nucleic acids. Consequently, organisms have  
60 evolved complex mechanisms to control ROS levels and reduce their toxicity and  
61 detrimental effects (reviewed in [2] and [3]). Some of them are well characterised, for  
62 example, the enzyme family of superoxide dismutases (SOD), which convert superoxide  
63 ions into oxygen and hydrogen peroxide [5]. The contribution of other proteins to oxidative  
64 defence is less well understood and often speculative. One such example is the COX11  
65 (cytochrome c oxidase 11) protein family.

66 Based on data mainly obtained from studies in yeast and bacteria, it is assumed that  
67 the main role of COX11 proteins is to deliver  $\text{Cu}^+$  to the  $\text{Cu}_B$  centre of the COX1 subunit  
68 of the COX complex (cytochrome c oxidase or complex IV of the respiratory chain) [6].

69 Dimeric COX11 proteins [7] are present in most respiring organisms, from which the  
70 homologue of the yeast *Saccharomyces cerevisiae* (ScCOX11) is probably the best-  
71 studied family member [8,9,10]. In our previous work, we identified and characterised the  
72 *Arabidopsis thaliana* COX11 homologue (AtCOX11) [11]. This homologue is, like the  
73 yeast counterpart, localised to mitochondria, presumably to the inner membrane, and  
74 involved in COX complex assembly. Interestingly, not only knockdown (KD) but also  
75 overexpression (OE) of *AtCOX11* reduced COX complex activity by ~50% and ~20%,  
76 respectively [11]. We proposed that both surplus and shortage of COX11 may interfere  
77 with the fine-tuned copper delivery balance necessary for COX complex assembly. In line  
78 with this, the absence of ScCOX11 leads to a non-functional COX complex and  
79 respiratory deficiency in yeast [6,8,12].

80 However, members of this conserved protein family might be directly involved in  
81 mitochondrial oxidative metabolism, as suggested by several publications [13,14,15,16].  
82 Pungartnik *et al.* [13] showed that the yeast *Sccox11* null mutant is highly sensitive to the  
83 ROS inducing chemicals N-nitrosodiethylamine and 8-hydroxyquinoline. Subsequently,  
84 Khalimonchuk *et al.* [14] and Veniamin *et al.* [15] demonstrated that the  $\Delta Sccox11$  strain  
85 also showed an increased sensitivity to hydrogen peroxide when compared with the WT  
86 strain. For the rice (*Oryza sativa*) COX11 homologue (OsCOX11), direct scavenging of  
87 ROS was suggested [16]. The authors reported that OsCOX11 dysfunction leads to a  
88 loss of pollen viability, presumably because the timing of a ROS burst necessary for pollen  
89 maturation is disturbed. Our previous investigation on AtCOX11 also hinted at its  
90 contribution to ROS homeostasis during pollen germination [11]: both the *AtCOX11* KD  
91 and OE lines exhibited reduced pollen germination rates, which did not correlate with the

92 observed changes in COX activity, suggesting that AtCOX11 may have an additional  
93 function during pollen germination besides COX assembly.

94 However, the role of COX11 in ROS homeostasis remained elusive. Here, we present  
95 our data of a more detailed investigation of COX11's involvement in oxidative metabolism.  
96 Our results indicate that both *Arabidopsis* and yeast COX11 partake in oxidative stress  
97 defence, possibly directly by scavenging ROS.

98

## 99 **Material and methods**

### 100 **Plant material and culture conditions**

101 *Arabidopsis thaliana* (At) Columbia (Col) 0 was used as the WT. The *AtCOX11* knock-  
102 down (KD) and overexpressing (OE) lines were previously generated and characterised  
103 [11]. KD1/OE lines and KD2 lines were used in T3 and T2 generations, respectively.

104 Plants were grown either on MS (1x Murashige and Skoog salts, 1% [w/v] sucrose,  
105 0.5 g/L 4-morpholineethanesulfonic acid [MES], 0.8% [w/v] agar) plates or on soil  
106 (Einheitserde, type P, Pätzer, Sinnatal-Jossa, Germany; mixed with sand 4:1, fertilised by  
107 watering with 0.1% [v/v]) Wuxal Basis, Aglukon). For protoplast generation, the MS + 1%  
108 sucrose media (for KD lines) was supplemented with 30 µg/mL of kanamycin.

109 Plants were cultured in a growth chamber with a light intensity of 150 µmol/m<sup>2</sup>s,  
110 relative humidity of 35% and day/night temperatures of 24/21°C, respectively. Two types  
111 of day/night cycles were used: long day (16-h d) and short day (10-h d).

### 112 **Yeast material and culture conditions**

113 *Saccharomyces cerevisiae* (Sc) WT strain BY4741 (Accession (Acc.) number (no.)  
114 Y00000) and deletion strains  $\Delta$ *Sccox11* (Acc. no. Y06479) and  $\Delta$ *Scsod1* (Acc. no.  
115 Y06913 and Y16913) were obtained from EUROSCARF (Frankfurt, Germany). The  
116  $\Delta$ *cox11* $\Delta$ *sod1* strain (MAT *a*; *his3* $\Delta$ 1; *leu2* $\Delta$ 0; *ura3* $\Delta$ 0; *YJR104c::kanMX4*;  
117 *YPL132w::kanMX4*) was generated by crossing the respective single-deletion strains  
118 followed by sporulation, tetrad dissection and analysis.

119 Constructs used for *COX11* overexpression (*pAG415ADH-AtCOX11* and  
120 *pAG415ADH-ScCOX11*) were generated previously [11]. To create the soluble versions  
121 of *COX11*, fragments were amplified by PCR (for primer sequences and cloning details  
122 see S1 Table) and inserted by Gateway cloning into pDONR or pENTR vectors. All  
123 constructs were moved into the high-copy yeast expression-vector pAG425GPD-ccdB-  
124 EGFP [17]. Yeast cells were transformed as described in Gietz and Schiestl [18].  
125 Transformed yeast strains were cultured on minimal media (0.5% [w/v] ammonium  
126 sulphate, 0.19% [w/v] yeast nitrogen bases, 2% [w/v] glucose, 2.5% [w/v] agar and  
127 required amino acids). For oxidative stress tests, YPD (yeast peptone dextrose) media  
128 (1% [w/v] yeast extract, 2% [w/v] peptone, 2% [w/v] glucose, 2% [w/v] agar) supplemented  
129 with the corresponding oxidative stressors was used. Media were cooled to 55°C; freshly  
130 prepared chemical stocks were added just before pouring, and plates were used within  
131 24 h. For liquid cultures, yeast strains were cultured at 30°C with shaking at 180 rpm.

132 For growth analysis, yeast strains were cultured in liquid minimal media for 24 h, then  
133 diluted with minimal media to OD<sub>600</sub> = 0.05 and cultured for another 16 h. Serial dilutions  
134 were spotted on solid media plates (YPD with or without oxidative stressors). Growth was  
135 documented after incubation for 48-60 h at 30°C.

## 136 **Bioinformatic analysis**

137 *Arabidopsis* and yeast gene and protein sequences were obtained from The  
138 *Arabidopsis* Information Resource [19] and the GeneBank [20], respectively. For protein  
139 sequence alignment, the EMBOSS Needle software (The European Bioinformatics  
140 Institute) [21] was used. For the prediction of targeting signal cleavage sites, TargetP  
141 [22,23] was used, and the transmembrane domains were predicted with TMHMM2.0 [24].  
142 Disulphide bridge formation in proteins was predicted with DiANNA 1.1 [25,26,27]. The  
143 Genevestigator was used to examine public microarray databases [28].

## 144 **Stress treatments and qPCR**

145 For the oxidative stress treatments, the *Arabidopsis* WT seedlings were cultured on  
146 solid MS plates + 1% (w/v) sucrose for 12 days. Stress was applied for 2 h or 6 h by  
147 placing seedlings on the surface of liquid MS + 1% (w/v) sucrose media supplemented  
148 with the appropriate stressor. Antimycin A (Sigma Aldrich) stock was dissolved in absolute  
149 ethanol and subsequently diluted with MS media. As a control, seedlings were placed on  
150 the surface of liquid MS + 1% (w/v) sucrose media without the stressors. Immediately  
151 after the stress treatment, the seedlings were frozen in liquid nitrogen, and RNA was  
152 isolated. RNA isolation and quantitative real-time RT-PCR (qPCR) were performed as  
153 previously described [11]. The RNA quality was analysed with the BioAnalyzer 2100  
154 (Agilent, USA), and only RNAs with RNA integrity numbers (RIN) in the range of 7.5 to  
155 8.5 were reverse transcribed. The efficiency and optimal concentrations of all primer pairs  
156 were experimentally determined and are listed in the S2 Table. The data were statistically  
157 analysed with the Bio-Rad CFX Manager 3.1 software.

## 158 **Lipid peroxidation measurement**

159 The levels of lipid peroxidation were determined with the Bioxytech LPO-586 kit  
160 (OxisResearch, USA). Rosette leaves from plants (10 weeks old) grown under short-day  
161 conditions were harvested at the beginning of the light period and immediately ground  
162 with a pestle in a mortar with 500  $\mu$ L of grinding buffer (20 mM Tris-Cl pH 7.4, 5 mM  
163 butylated hydroxytoluene) per 100 mg of tissue. The leaf suspension was cleared by two  
164 centrifugation steps (each 3,000g for 10 min at 4°C). Of the final supernatant, 7  $\mu$ L and  
165 100  $\mu$ L were used for quantitation of protein concentration (Bio-Rad DC assay, USA) and  
166 lipid peroxidation measurements, respectively. The “reagent 2” (methanesulfonic acid)  
167 was employed to determine the amounts of malondialdehyde (MDA) and 4-  
168 hydroxyalkenals (HAE). All samples were run in triplicates and read out with a TECAN  
169 M200 plate reader (Tecan, Switzerland). The lipid peroxidation levels were normalised to  
170 the protein concentrations in the supernatants.

## 171 **ROS level measurement in protoplasts**

172 Protoplasts were isolated as previously described [29] with slight modifications. Of  
173 the protoplasting buffer (20 mM KCl, 20 mM 4-morpholineethanesulfonic acid [MES], 0.4  
174 M mannitol, 1.25% [w/v] cellulase R-10, 0.3% [w/v] macerozyme R-10, 10 mM CaCl<sub>2</sub>,  
175 0.1% [w/v] BSA, pH 5.7) 1.5 mL were added to approximately 100 mg of finely cut 12-d-  
176 old seedlings cultured under long-day conditions. After 4 h of agitation at room  
177 temperature, the suspensions were successively filtered through 100- and 50- $\mu$ m  
178 meshes. Protoplasts were pelleted (280g for 10 min at 4°C) and washed first with W5  
179 buffer (154 mM NaCl, 125 mM CaCl<sub>2</sub>, 5 mM KCl, 5 mM MES, pH 5.7), and then with MMG  
180 buffer (0.4 M mannitol, 15 mM MgCl<sub>2</sub>, 4 mM MES, pH 5.7). They were finally resuspended  
181 and stored in MMG buffer at 4°C until use. All buffers were prepared fresh.



182 For determination of ROS levels, protoplasts were incubated with 5  $\mu$ M DCFDA (2',7'  
183 dichlorofluorescein diacetate) for 10 min [30] and then imaged with the LSM780  
184 microscope from Zeiss (C-Apochromat 40x/1.20 W Korr M27 objective, excitation with  
185 488-nm laser, detection in 510-542 nm range for DCF (2',7' dichlorofluorescein) and 647-  
186 751 nm for chlorophyll autofluorescence). The total fluorescence was determined with the  
187 Fiji image analysis software [31] as raw integrated density in the green channel of  
188 individual protoplasts. Protoplasts with chloroplasts, which are derived from  
189 photosynthetic tissues, were excluded to avoid measurement of ROS produced by  
190 photosystems.

## 191 **ROS level measurement in yeast cells**

192 Liquid YPD media was inoculated with the respective strains and cultured for 24 h.  
193 Then the cultures were diluted to OD<sub>600</sub> of 0.01, grown overnight (14-16 h) and used to  
194 start the final YPD cultures (starting OD<sub>600</sub> = 0.1), which were incubated at 30°C until an  
195 OD<sub>600</sub> of 0.5-0.6 was reached. This successive refreshing was necessary to ensure the  
196 same physiological state of all strains. Cultures were aliquoted (1 mL each) into 2-mL  
197 tubes and either treated with water (= mock) or with 2 mM paraquat (PQ; methyl viologen  
198 from Sigma Aldrich) for 30 min at 30°C with agitation. Subsequently, cells were pelleted  
199 (3500g for 3 min at RT) and washed twice with PBS. Finally, cells were resuspended in  
200 1 mL of PBS and split into two aliquots. One was used as the negative control, while the  
201 other was stained with DCFDA (final concentration 20  $\mu$ M) for 45 min at 30°C with  
202 agitation. After staining, cells were washed twice with PBS. Total DCF fluorescence was  
203 measured in the CyFlow SL (Partec, Germany) with 488-nm excitation and detection in

204 FL1 channel (527 nm/BP 30 nm). FL1 channel gain was set to a level on which  
205 fluorescence could not be observed in negative unstained controls.

206

## 207 **Results**

### 208 **Oxidative stress induces *AtCOX11* expression**

209 As a first step to investigate a role of *AtCOX11* in ROS homeostasis, as previously  
210 proposed [11], we analysed its promoter region for the presence of *cis*-active ROS-  
211 responsive elements which are prevalent in known ROS-induced genes [32,33]. In  
212 *AtCOX11*, the non-coding region upstream of the start codon harbours as many as 16  
213 putative oxidative-stress-responsive elements (Fig 1A and S1 Fig). In contrast, the  
214 promoter region of *AtHCC1*, another mitochondrial chaperone delivering copper to the  
215 COX complex [34], contains only five ROS-responsive consensus sequences. *AtHCC1*  
216 stands for homologue of copper chaperone SCO1 (synthesis of cytochrome c oxidase 1).

217

218 **Fig 1. *AtCOX11* is upregulated by oxidative stress.** (A) Scaled diagram of putative  
219 ROS-responsive elements within the *AtCOX11* promoter and 5'UTR. (B) and (C) Gene  
220 regulation in response to oxidative stress. Stress was applied for 2 h and 6 h as described  
221 in the methods section. Mean values of mRNA levels in treated samples were normalized  
222 to the control sample and plotted on a logarithmic scale (base 2). Values and statistical  
223 significance compared with the control sample (\*\*P < 0.01; \*\*\*P < 0.001) were calculated  
224 with the CFX manager software. Error bars represent  $\pm$  standard deviation  
225 (SD). Individual values and SD are listed in the S3 Table.

226

227 The overrepresentation of putative ROS-responsive elements prompted us to  
228 analyse the expression levels of *AtCOX11* transcripts under oxidative stress (Fig 1B). We  
229 treated WT seedlings for 2 h or 6 h with the oxidative reagents hydrogen peroxide (H<sub>2</sub>O<sub>2</sub>),  
230 tert-butyl hydroperoxide (t-BOOH) and antimycin A followed by qPCR analyses.  
231 Hydrogen peroxide is a ROS molecule which easily transverses membranes and induces  
232 oxidative stress throughout the whole cell, while the organic peroxide t-BOOH is  
233 transported to mitochondria as well as other cellular compartments [35]. Antimycin A  
234 induces ROS production at the mitochondrial electron transport chain by inhibiting the  
235 respiratory complex III [36]

236 *AtCRK21* (cysteine-rich receptor-like protein kinase 21) and *AtAOX1a* (alternative  
237 oxidase 1a) are known to be down- and upregulated [37] by ROS, respectively, and were  
238 therefore chosen as controls. As expected, oxidative stress reduced *AtCRK21* levels,  
239 while *AtAOX1a* mRNA abundance was increased about 19-fold (Fig 1B).

240 *AtCOX11* was slightly upregulated (~1.3 fold) in response to all three 2-h oxidative  
241 stress conditions. The upregulation further increased to ~2 fold after 6 h. These data  
242 suggest that at least some of the regulatory elements present in the *AtCOX11* promoter  
243 region are functional.

244 In order to check whether the *AtCOX11* ROS-response profile is unique and specific,  
245 the expression of other COX assembly and subunit genes was analysed under oxidative  
246 stress. The transcript levels of the copper chaperone *AtHCC1* were only marginally  
247 affected at both time points (Fig 1C). On the other hand, its homologue *AtHCC2*  
248 (homologue of copper chaperone SCO2), which lacks a copper-binding motif [38], was

249 affected by ROS. It showed a decrease of the transcript level by about half (Fig 1C), even  
250 though its promoter region carries seven putative ROS-responsive elements (S1 Fig).  
251 *AtHCC2* levels, 2.2 times higher after a 6-h antimycin A treatment, were a notable  
252 exception from the otherwise observed downregulation. Although the *AtHCC2* expression  
253 pattern was different from *AtCOX11*, the fact that *AtHCC2* responded to ROS fits a  
254 previously proposed role of *AtHCC2* in redox homeostasis [38,39].

255 The transcript levels of another COX-related gene, the COX subunit *AtCOX5b-1*,  
256 were reduced by ~30% after 2 h of oxidative stress and by ~50% after 6 h, except for the  
257 H<sub>2</sub>O<sub>2</sub> treatment, which had no effect at this time point (Fig 1C). Clearly, not all  
258 mitochondrial genes respond to ROS, and if they do not in the same way. Our qPCR data  
259 for all genes analysed are backed up by public microarray data (Genevestigator  
260 database) of a 3-h treatment with 50 µM antimycin A (applied by spraying) [40] (S4 Table).

261 Taken together, *AtCOX11* shows a unique ROS response characterized by an  
262 accumulation of transcripts for all three oxidative stressors applied. In addition, the  
263 response increased over time supporting a role of *AtCOX11* in ROS homeostasis as  
264 suggested by the enrichment of ROS-responsive elements in its promoter region.

## 265 **Knockdown of *AtCOX11* reduces cellular ROS**

266 To explore a role in ROS homeostasis further, ROS levels were measured in the  
267 *Arabidopsis* *COX11* KD and OE plant lines that were generated previously [11]. The  
268 *AtCOX11* mRNA levels in KD plants were approximately 30% of the WT levels, while in  
269 the two overexpression lines OE1 and OE2, the transcript amounts were approximately  
270 6- and 4-fold higher, respectively [11]. ROS levels were measured by two independent  
271 methods: indirectly by determining the lipid peroxidation levels (Fig 2A), and directly by

272 staining protoplasts with the ROS-specific dye DCFDA (Fig 2B). For lipid peroxidation  
273 measurements, plants were grown for 14 h in the dark prior to the experiments to minimise  
274 ROS contributions from photosystems. Then, the leaves were harvested to measure MDA  
275 and HAE concentrations, typical products generated by decomposing lipid peroxides.

276

277 **Fig 2. Disturbance of *AtCOX11* expression alters cellular ROS levels.** (A) Lipid  
278 peroxidation was determined in *AtCOX11* knock-down (KD) and overexpression (OE)  
279 mutants by measuring the concentration of malondialdehyde (MDA) and hydroxyalkenals  
280 (HAE) in their leaves and normalised to the WT (= 100%). Each bar represents the mean  
281  $\pm$  SD of five independent experiments. (B) Box plots of DCF fluorescence in arbitrary units  
282 (a. u.) as an indicator of ROS levels in protoplasts from WT and *AtCOX11* KD and OE  
283 mutants are shown. The distributions of fluorescence intensities of individual protoplasts  
284 from various genotypes are depicted. For each box the horizontal lines designate the  
285 median, and first and third quartile. The vertical lines and dots extending from each box  
286 mark the lowest and the highest fluorescence values. Asterisks indicate statistically  
287 significant difference (unpaired Student's t-test; \*P < 0.05, \*\*\*P < 0.001) between mutants  
288 and WT. The absolute and normalised values for (A) and descriptive statistics for (B) are  
289 given in S3 Table.

290

291 MDA and HAE levels were lower in all KD lines compared with the WT, albeit only  
292 statistically significant for KD1-1 and KD1-2 plants (Fig 2A). The levels in the OE lines  
293 were indistinguishable from the WT.

294        These data were confirmed by a second assay, in which protoplasts were incubated  
295        with the DCFDA dye, which upon entering the cell and oxidation by ROS exhibits a bright  
296        green fluorescence. All KD lines showed a statistically significant reduction in cellular  
297        ROS levels compared with the WT and again, the OE lines were indistinguishable from  
298        the WT (Fig 2B). Of note is that these assays detect ROS from the entire cell and might  
299        not be sensitive enough to detect subtle changes in the intermembrane space of  
300        mitochondria.

301        These results seemingly contradict a function of *Arabidopsis* COX11 in ROS defence.  
302        However, the observed phenotypes in the KD lines could be contributed to the loss of  
303        COX complex activity (see discussion for details). In summary, two different ROS  
304        detection methods revealed a reduction in ROS levels when *AtCOX11* expression was  
305        reduced, but no change in ROS amounts when *AtCOX11* was overexpressed.

## 306        **COX11 proteins play a role in oxidative stress tolerance in** 307        **yeast**

308        Next, we investigated the role of COX11 proteins in ROS homeostasis in another  
309        model organism, the budding yeast (*S. cerevisiae*). For this, *ScCOX11* was knocked out  
310        or overexpressed (alternatively *AtCOX11*) and the effects on cellular ROS levels were  
311        studied under normal and oxidative stress conditions (Fig 3A and 3B). Yeast cells were  
312        stained with the ROS-specific dye DCFDA, and the green fluorescence of each cell was  
313        measured by flow cytometry. For each data set, the mode, defined as a number that  
314        occurs most often in the data set, was determined. Mode corresponds to the X-axis  
315        position of the peak of the cell fluorescence intensity histogram (S2 Fig). Modes from  
316        three independent experiments were averaged and depicted as bar graphs (Fig 3A and

317 3B). Cell fluorescence intensity histograms representing the data from individual  
318 experiments are depicted in S2 Fig.

319

320 **Fig 3. COX11 proteins influence yeast oxidative stress tolerance.** ROS levels  
321 determined by DCFDA staining of WT,  $\Delta Sccox11$  (A) and *AtCOX11* or *ScCOX11*  
322 overexpressing (B) yeast strains; after either mock treatment or treatment with 2 mM  
323 paraquat (PQ). Total fluorescence of individual cells was measured by flow cytometry.  
324 Descriptive statistics for the cytometry datasets are given in S3 Table. Graphs in (A) and  
325 (B) depict averages of modes (see text for details). Each bar represents the mean of  
326 modes  $\pm$  SD from three independent experiments. Asterisks indicate statistically  
327 significant difference (unpaired Student's t-test; \*P < 0.05, \*\*P < 0.01, \*\*\*P < 0.001)  
328 between mode averages of mutant strains compared with the untreated WT (A) or  
329 corresponding empty vector control of the treated or untreated dataset (B) under the same  
330 treatment. (C) Growth on normal and oxidative stress media, of *ScCOX11* and *ScSOD1*  
331 double-deletion yeast strain was compared with single-deletion mutants as well as the  
332 WT strain.

333

334 Like in plants (Fig 2), the *ScCOX11* knock-out (KO;  $\Delta Sccox11$ ) strain showed a  
335 significant reduction in the cellular ROS levels compared with the WT strain (Fig 3A). The  
336 overexpression of either the yeast or plant COX11 protein did not affect ROS levels  
337 compared with the control strain transformed with the empty vector (Fig 3B). In addition,  
338 we treated all strains with 2 mM PQ to test whether the KO or OE of *COX11* changes

339 tolerance to oxidative stress. PQ is a ROS inducer and a redox cyler that targets primarily  
340 electron transport chains (ETC), [41,42].

341 PQ significantly increased cellular ROS levels in the WT compared with the untreated  
342 control (Fig 3A). The same treatment did not affect ROS levels in the respiratory deficient  
343 *ScCOX11* KO strain (Fig 3A). The *AtCOX11* or *ScCOX11* overexpressing yeast strains  
344 showed increased ROS levels in response to PQ (Fig 3B). However, the ROS levels'  
345 increase was slightly, but significantly smaller compared with the increase in the empty-  
346 vector control (Fig 3B). This indicates that the overexpression of COX11 genes can partly  
347 alleviate the oxidative stress. The reduction in ROS levels in the intermembrane space  
348 (IMS) might even be higher, because the DCFDA-staining results from total cellular ROS,  
349 thereby possibly masking the small contributions of the mitochondrial IMS compartment.

350 An intriguing possibility might be that the role of *ScCOX11* in ROS defence is  
351 redundant with main ROS defence mechanisms such as the action of *ScSOD1*, which is  
352 localised both in the cytoplasm and IMS [43]. To test this hypothesis, a *ScCOX11* and  
353 *ScSOD1* double-deletion mutant ( $\Delta Sccox11\Delta Scsod1$ ) was generated by crossing the  
354 respective single-deletion strains. The growth of the WT, double-deletion and the  
355 corresponding single-deletion strains was analysed under standard conditions (YPD) or  
356 oxidative stress (YPD + 0.2 mM PQ) (Fig 3C). On YPD media, all strains showed  
357 comparable growth. The added PQ did not affect the growth of the WT and  $\Delta Sccox11$   
358 mutant. As expected, the *ScSOD1* ( $\Delta Scsod1$ ) single-deletion strain showed a strong  
359 reduction in growth. Strikingly, the growth of the double-deletion mutant  
360  $\Delta Sccox11\Delta Scsod1$  was even more severely reduced, indicating partially overlapping  
361 functions of COX11 and SOD1.



362 Taken together, these results suggest that COX11 proteins are not major players of  
363 the ROS defence mechanism, but might contribute to ROS detoxification, possibly by  
364 scavenging.

## 365 **Soluble COX11 proteins improve yeast growth under oxidative** 366 **stress**

367 The big challenge in studying oxidative stress is the sensitivity of ROS detection  
368 assays. COX11 proteins function in the mitochondrial IMS, which is a rather small  
369 compartment. A change in ROS levels may be, at least partially, hidden due to ROS  
370 contributions from other cellular compartments. To circumvent this problem, we took  
371 another approach to test the ROS protective ability of COX11 proteins. Constructs were  
372 generated expressing soluble (sol) versions of the *Arabidopsis* and yeast COX11 proteins  
373 (Fig 4A) lacking the mitochondrial targeting signals and almost the entire transmembrane  
374 domains (TM) except for seven highly conserved amino acids (Fig 4A and S3 Fig).

375

376 **Fig 4. Soluble COX11 proteins improve yeast growth under oxidative stress. (A)**  
377 Scaled diagram of full-length COX11 proteins from *Arabidopsis thaliana* and  
378 *Saccharomyces cerevisiae* (top scheme) and truncated versions (AtCOX11<sub>sol</sub> = AtCOX11  
379 without amino acids (aa) 2-108; ScSCOX11<sub>sol</sub> = ScCOX11 without aa 2-100) (bottom  
380 scheme). The protein alignment and domain details are given in S3 Fig. The positions of  
381 cysteines (Cys) are indicated. aa (amino acids), MTS (mitochondrial targeting signal), TM  
382 (transmembrane domain), sol (soluble). (B) The growth of WT yeast expressing different  
383 soluble versions of *Arabidopsis* or yeast COX11 proteins under oxidative stress. In the

384 mutated soluble COX11 versions, either all three cysteines ( $\Delta$ Cys) or only one was  
385 replaced with an alanine. Serial dilutions of yeast strains were spotted on YPD media  
386 without or with increasing concentration of the cellular oxidative stressor menadione.  
387 Diagrams on the right visualize possible disulphide-bridge formation in each protein  
388 version (see text for details). Depicted growth assays are exemplary from at least three  
389 independent experiments.

390

391 Control constructs consisted of the empty expression vector and the vector  
392 expressing green fluorescence protein (GFP). GFP has a similar molecular weight as  
393 COX11, so its expression should exert the same energetic cost on the cells as the  
394 expression of *COX11*, making it a suitable control. WT yeast cells were transformed with  
395 these constructs and their growth monitored on YPD plates (Fig 4B). Menadione was  
396 chosen as the oxidative stressor because it is a known general redox cycler and ROS  
397 inducer in the cytoplasm and other compartments [44].

398 All yeast strains grew equally well in the absence of oxidative stress. When  
399 menadione was added to the medium, however, the empty-vector, as well as the GFP-  
400 expressing controls, were almost unable to maintain growth, even at the lowest  
401 menadione concentration (Fig 4B). The halted growth of the GFP control shows that the  
402 overexpression of a random protein does not confer oxidative stress tolerance.

403 The yeast strains expressing either *AtCOX11<sub>sol</sub>* or *ScCOX11<sub>sol</sub>*, however, continued  
404 to grow at all three menadione concentrations tested (Fig 4B). At the lowest concentration  
405 of 110  $\mu$ M, growth remained almost unaffected. These results indicate that the increased

406 menadione tolerance in yeast expressing soluble COX11 is likely linked to some intrinsic  
407 feature(s) of the COX11 proteins.

408 What is the feature that allows COX11 proteins to heighten resistance to oxidative  
409 stress? One possibility would be the three highly conserved cysteines present in COX11  
410 proteins, of which two belong to the copper-binding motif (Fig 4A and S3 Fig) [7]. There  
411 are additional cysteines present in the N-termini of the COX11 proteins (S3 Fig), but they  
412 are part of the predicted mitochondrial targeting signal and therefore absent in the mature  
413 proteins.

414 To test the importance of the conserved cysteines, we generated the mutant strain  
415  $\Delta$ cys in which the three cysteines were converted into alanines. This strain was still able  
416 to moderately grow in the presence of 110  $\mu$ M menadione, but not of 120 and 130  $\mu$ M.  
417 This result demonstrated that the conserved cysteines apparently do play a role in the  
418 ability of COX11 proteins to diminish the oxidative stress burden, possibly by directly  
419 detoxifying ROS molecules through oxidation and formation of intracellular disulphide  
420 bridges.

421 To find out which of the three possible bridges (labelled "a", "b" and "c" in the  
422 schematic illustrations in Fig 4B) might be involved, we generated six more constructs,  
423 three *Arabidopsis* and three yeast *COX11* versions, in which in each case one of the three  
424 cysteines was mutated to an alanine thus restricting the number of putative disulphide  
425 bridges that can be formed (illustrated in the schemes on the right of Fig 4B). The yeast  
426 strains transformed with the *COX11* versions that could either form bridge "a" or bridge  
427 "c" retained their capacity to improve the resistance of the cells to oxidative stress, similar  
428 to the strains expressing the soluble versions with all three cysteines. In contrast to that,

429 the strains expressing the versions which could only form bridge “b” showed the same  
430 reduced stress resistance as the  $\Delta$ cys versions. These results suggest that the formation  
431 of either bridge “a” (Cys<sub>208</sub> and Cys<sub>210</sub> in yeast; Cys<sub>219</sub> and Cys<sub>221</sub> in *Arabidopsis*) or bridge  
432 “c” (Cys<sub>111</sub> and Cys<sub>208</sub> in yeast; Cys<sub>119</sub> and Cys<sub>219</sub> in *Arabidopsis*) or both might be the  
433 feature that allows COX11 proteins to detoxify ROS.

434 In summary, our data show that soluble forms of COX11 proteins increase the  
435 oxidative stress tolerance in yeast involving the conserved cysteines, possibly through  
436 the formation of disulphide bridges.

437

## 438 Discussion

439 The role of COX11 proteins as copper chaperones in COX complex assembly has  
440 been well documented [8,9,11,12,45]. In this work, we present evidence that COX11  
441 proteins have an auxiliary role in the defence against oxidative stress.

442 The initial hint for such a role came from our observation that the expression of the  
443 *Arabidopsis COX11* gene was upregulated in response to oxidative stress (Fig 1B). This  
444 appeared to be a specific response of the *AtCOX11* gene and not part of a general  
445 upregulation of mitochondrial genes because *AtHCC1* levels, for example, remained  
446 unchanged and *AtHCC2* and *AtCOX5b-1* genes were downregulated (Fig 1C).  
447 Interestingly, *AtHCC2*, which has also been implicated in ROS defence after UV-B light  
448 exposure [38], responded to the chemical oxidative stressors mostly with downregulation.  
449 When antimycin A was applied, however, the *AtHCC2* transcript levels were initially  
450 reduced but increased after 6 h (Fig 1C). These findings confirm previous reports on the

451 sensitivity of the oxidative defence machinery to the type of stressor and the time point of  
452 analysis [37,46]. Taken together, this data supports that *AtCOX11* likely has an auxiliary  
453 role in the oxidative defence in addition to its main role in copper transport.

454 One would expect that knockdown and overexpression of an oxidative stress defence  
455 protein to result in higher and lower ROS levels, respectively. Nevertheless, at first  
456 glance, our experiments did not fulfil these predictions and even yielded opposite results  
457 with knock-down plant mutants having reduced ROS levels (Fig 2). This reduction could  
458 be the result of the lower COX complex activity found in these plants (~50% of the WT  
459 [11]), as previously reported in mice mutants, where COX deficiency led to decreased  
460 oxidative stress [47]. The absence of a functional COX has repeatedly been reported to  
461 result in the downregulation of other respiratory complexes [48,49], eventually reducing  
462 the ROS load that is typically associated with the functional respiratory chain [4].  
463 Moreover, the increased expression of alternative oxidases in COX-deficient mutants, as  
464 observed in *AtCOX11* KD plants [11], is probably a mechanism to compensate for the  
465 COX loss and was shown to lower mitochondrial reactive oxygen production in plant cells  
466 [50]. Therefore, both the COX deficiency and the expression of alternative oxidases may  
467 mask the reduced ROS-scavenging contribution of COX11 in the *AtCOX11* KD lines.

468 Unexpectedly, no difference in total cellular ROS amounts was found between  
469 *COX11* OE plants and the WT. However, as the mitochondrial IMS accounts for only a  
470 minor portion of the ROS-producing cellular compartments, a possible ROS-scavenging  
471 effect by a mild *AtCOX11* overexpression may have escaped detection.

472 Analogous experiments with yeast *ScCOX11* knock-out and overexpressing strains  
473 cultured under standard conditions yielded similar results as observed in plants (Figs 2

474 and 3): lower ROS levels in  $\Delta Sccox11$ , and levels indistinguishable from the WT in the  
475 overexpressing strains. However, when the *COX11* OE strains were treated with PQ, their  
476 ROS levels were lower compared with the treated empty-vector control (Fig 3B and S2  
477 Fig). Therefore, it appears that COX11 proteins confer some level of protection under  
478 oxidative stress conditions. Alternatively, the difference between ROS levels was large  
479 enough to be detected in this experimental setup.

480 Further evidence that COX11 proteins are involved in mitochondrial oxidative defence  
481 came from the *ScCOX11* and *ScSOD1* double-deletion strain (Fig 3C). The fact that this  
482 strain showed a much higher sensitivity to PQ than either single-deletion or WT strains  
483 indicates that *ScCOX11* and *ScSOD1*, both of which function in the IMS, have  
484 overlapping and additive functions. COX11 proteins might help the main mitochondrial  
485 ROS defence players, like SOD1, under heightened oxidative stress or even normal  
486 conditions. The COX11 proteins, as COX complex chaperones, are in the vicinity of ROS-  
487 generating respiratory complexes and could therefore potentially quickly detoxify ROS  
488 and prevent damage.

489 These results suggest that COX11 proteins might directly or indirectly affect ROS  
490 levels in the IMS. However, as already mentioned, evaluation of ROS levels in the  
491 mitochondrial IMS is technically challenging. Therefore, we generated genetic constructs  
492 for the expression of soluble versions of *AtCOX11* and *ScCOX11* in the cytoplasm of  
493 yeast cells (Fig 4A). Both soluble versions permitted growth in the presence of ROS-  
494 inducing menadione (Fig 4B), showing that COX11 proteins are indeed able to reduce  
495 oxidative stress. Since the antioxidative function was exerted even in the non-native

496 cellular environment, one may speculate that COX11 proteins are able to function in ROS  
497 defence, independently of other proteins.

498 The mutation of all three cysteines in the COX11 proteins mostly abolished their  
499 ability to convey growth under oxidative stress, emphasizing the role of these amino acid  
500 residues in ROS detoxification. However, when compared with the GFP-expressing  
501 control strain, the triple cys mutants were still more resistant to menadione, hinting at an  
502 additional ROS-protective mechanism aside from cysteine oxidation. For example, the  
503 oxidation of other COX11 amino acids side chains (e.g. methionine; S3 Fig) by ROS  
504 molecules. Based on the data from the various mutants, the most fitting mechanism is  
505 that COX11 is scavenging ROS directly by the formation of disulphide bridges (S-S)  
506 between the conserved cysteines (Fig 4B, see diagrams on the right) as previously  
507 reported for other ROS protectants, e.g. the human PRX3 (peroxiredoxin-3) [3]. To  
508 address this hypothesis, we analysed the contribution of the cysteines and putative S-S  
509 bridges between them (named a, b and c in Fig 4B) to the observed COX11 antioxidant  
510 activity. We generated variant forms of COX11 with individual cysteines mutated to  
511 alanines, only allowing the formation of a single putative S-S bridge (Fig 4B, right). The  
512 cysteine combinations 119/219 or 219/221 in *Arabidopsis* and 111/208 or 208/210 in  
513 yeast, maintained growth under oxidative stress. Interestingly, the various menadione  
514 concentrations used, highlight the sensitivity of oxidative stress tests. At a concentration  
515 of 110  $\mu$ M the loss of one of the three cysteines had no effect, but a mere increase of  
516 10% to 120  $\mu$ M made the difference in oxidative stress resistance readily apparent.  
517 Specifically, the loss of cysteine 219/208 (*Arabidopsis*/yeast) diminished the antioxidant

518 activity, corroborating the hypothesis that the ability to form the S-S bridges a and/or c is  
519 crucial.

520 In their study of yeast COX11, Bode *et al.* [51] provided experimental evidence for  
521 the formation of the disulphide bridge between the two cysteines 208 and 210 within the  
522 Cu-binding motif (= bridge a). On the other hand, the disulphide bond prediction software  
523 DiANNA 1.1 predicted only the formation of bridge c, albeit with a low probability score  
524 (*Arabidopsis*/yeast COX11 bridge a: 0.01/0.01, bridge b: 0.01/0.01 and bridge c:  
525 0.12/0.16; maximum score: 1). Furthermore, both the previously published crystal  
526 structure [52] of a bacterial COX11 (*Sinorhizobium meliloti*) and the model [53] of human  
527 COX11 revealed that all three conserved cysteines are on the protein surface and thus  
528 easily accessible to oxidation by ROS molecules and S-S bridge formation. Of note is that  
529 COX11 proteins - in addition to the formation of intramolecular disulphide bridges within  
530 a single COX11 subunit - could potentially also form intermolecular bridges between two  
531 COX11 subunits or between COX11 and another protein or e.g. glutathione (GSH).

532 As an alternative explanation for their antioxidant activity, the COX11 copper  
533 chaperones may use the bound copper to detoxify ROS. However, this scenario seems  
534 unlikely, because our experiments demonstrate that the loss of one of the cysteines in  
535 the copper-binding motif (cys 221 and 210 in *Arabidopsis* and yeast COX11, respectively)  
536 did not eliminate the COX11 antioxidant activity (Fig 4B).

537 Taken together, the findings that the mutation of the respective cysteines had the  
538 same positive or negative antioxidant effects in two evolutionary distant organisms like  
539 *Arabidopsis* and yeast, pinpoint that these cysteines and their functions were obviously  
540 important to be conserved during evolution.



541 Therefore, it seems plausible that the formation of either disulphide bridge a or c, or  
542 both, is the mechanism by which COX11 proteins detoxify ROS. These potentially ROS-  
543 induced S-S bridges could subsequently be reduced in the IMS by thioredoxins or  
544 proteins with a putative thioredoxin domain such as AtHCC2 [38], or by other redox  
545 systems, e.g. the ERV1/MIA40 IMS protein import system [3]. While many open questions  
546 remain regarding the role of COX11 proteins in ROS metabolism, the data presented here  
547 show that the *Arabidopsis* and *S. cerevisiae* COX11 proteins are able to relieve oxidative  
548 stress. COX11 proteins might play a role in alleviating ROS stress generated by the  
549 respiratory complexes or are needed under elevated oxidative stress as the second line  
550 of defence.

551

## 552 **Acknowledgments**

553 We thank the Light Microscopy Facility of the BIOTEC/CRTD at Technische  
554 Universität Dresden for their help with our confocal microscopy experiments.

555

## 556 **References**

- 557 1. Millar AH, Small ID, Day DA, Whelan J. Mitochondrial Biogenesis and Function in  
558 *Arabidopsis*. The *Arabidopsis* Book / American Society of Plant Biologists. 2008;  
559 6: e0111. doi: 10.1199/tab.0111
- 560 2. Gill SS, Tuteja N. Reactive oxygen species and antioxidant machinery in abiotic  
561 stress tolerance in crop plants. *Plant physiology and biochemistry*. 2010; 48: 909-  
562 930. doi: 10.1016/j.plaphy.2010.08.016

- 563 3. Mailloux RJ, McBride SL, Harper M-EE. Unearthing the secrets of mitochondrial  
564 ROS and glutathione in bioenergetics. Trends in biochemical sciences. 2013; 38:  
565 592-602. doi: 10.1016/j.tibs.2013.09.001
- 566 4. Moller IM. Plant Mitochondria and Oxidative Stress: Electron Transport, NADPH  
567 Turnover, and Metabolism of Reactive Oxygen Species. Annual Review of Plant  
568 Physiology and Plant Molecular Biology. 2001; 52: 561-591. doi:  
569 10.1146/annurev.arplant.52.1.561
- 570 5. Fridovich I. The biology of oxygen radicals. Science. 1978; 201: 875-880. doi:  
571 10.1126/science.210504
- 572 6. Tzagoloff A, Capitanio N, Nobrega MP, Gatti D. Cytochrome oxidase assembly in  
573 yeast requires the product of COX11, a homolog of the *P. denitrificans* protein  
574 encoded by ORF3. The EMBO Journal. 1990; 9: 2759-2764.
- 575 7. Khalimonchuk O, Rödel G. Biogenesis of cytochrome *c* oxidase. Mitochondrion.  
576 2005; 5: 363-388. doi: 10.1016/j.mito.2005.08.002
- 577 8. Carr HS, George GN, Winge DR. Yeast Cox11, a protein essential for cytochrome  
578 *c* oxidase assembly, is a Cu(I)-binding protein. The Journal of biological chemistry.  
579 2002; 277: 31237-31242. doi: 10.1074/jbc.M204854200
- 580 9. Carr HS, Maxfield AB, Horng Y-CC, Winge DR. Functional analysis of the domains  
581 in Cox11. The Journal of biological chemistry. 2005; 280: 22664-22669. doi:  
582 10.1074/jbc.M414077200
- 583 10. Khalimonchuk O, Ostermann K, Rödel G. Evidence for the association of yeast  
584 mitochondrial ribosomes with Cox11p, a protein required for the Cu(B) site

- 585 formation of cytochrome c oxidase. *Current genetics*. 2005; 47:223-233. doi:  
586 10.1007/s00294-005-0569-1
- 587 11. Radin I, Mansilla N, Rödel G, Steinebrunner I. The *Arabidopsis* COX11 Homolog  
588 is Essential for Cytochrome c Oxidase Activity. *Frontiers in Plant Science*. 2015;  
589 6: 1091. doi: 10.3389/fpls.2015.01091
- 590 12. Banting GS, Glerum DM. Mutational analysis of the *Saccharomyces cerevisiae*  
591 cytochrome c oxidase assembly protein Cox11p. *Eukaryotic cell*, 2006; 5: 568-578.  
592 doi: 10.1128/EC.5.3.568-578.2006
- 593 13. Pungartnik C, Picada J, Brendel M, Henriques JA. Further phenotypic  
594 characterization of *pso* mutants of *Saccharomyces cerevisiae* with respect to DNA  
595 repair and response to oxidative stress. *Genetics and molecular research*. 2002;  
596 1: 79-89.
- 597 14. Khalimonchuk O, Bird A, Winge DR. Evidence for a pro-oxidant intermediate in the  
598 assembly of cytochrome oxidase. *The Journal of biological chemistry*. 2007; 282:  
599 17442-17449. doi: 10.1074/jbc.M702379200
- 600 15. Veniamin S, Sawatzky LG, Banting GS, Glerum DM. Characterization of the  
601 peroxide sensitivity of COX-deficient yeast strains reveals unexpected  
602 relationships between COX assembly proteins. *Free radical biology & medicine*.  
603 2011; 51: 1589-1600. doi: 10.1016/j.freeradbiomed.2011.06.024
- 604 16. Luo D, Xu H, Liu Z, Guo J, Li H, Chen L, *et al*. A detrimental mitochondrial-nuclear  
605 interaction causes cytoplasmic male sterility in rice. *Nature genetics*. 2013; 45:  
606 573-577. doi: 10.1038/ng.2570

- 607 17. Alberti S, Gitler A, Lindquist S. A suite of Gateway cloning vectors for high-  
608 throughput genetic analysis in *Saccharomyces cerevisiae*. *Yeast*. 2007; 24: 913-  
609 919. doi: 10.1002/yea.1502
- 610 18. Gietz D, Schiestl R. High-efficiency yeast transformation using the LiAc/SS carrier  
611 DNA/PEG method. *Nature protocols*. 2007; 2: 31-34. doi: 10.1038/nprot.2007.13
- 612 19. Lamesch P, Berardini TZ, Li D, Swarbreck D, Wilks C, Sasidharan R, *et al*. The  
613 *Arabidopsis* Information Resource (TAIR): improved gene annotation and new  
614 tools. *Nucleic acids research*. 2012; 40: D1202-D1210. doi: 10.1093/nar/gkr1090
- 615 20. Benson DA, Cavanaugh M, Clark K, Karsch-Mizrachi I, Lipman DJ, Ostell J, *et al*.  
616 GenBank. *Nucleic acids research*. 2013; 41: D36-D42. doi: 10.1093/nar/gks1195
- 617 21. McWilliam H, Li W, Uludag M, Squizzato S, Park YM, Buso N, *et al*. Analysis tool  
618 web services from the EMBL-EBI. *Nucleic Acids Research*. 2013; 41: W597-W600.  
619 doi: 10.1093/nar/gkt376
- 620 22. Emanuelsson O, Nielsen H, Brunak S, Heijne G. Predicting subcellular localization  
621 of proteins based on their N-terminal amino acid sequence. *Journal of molecular*  
622 *biology*. 2000; 300: 1005-1016. doi: 10.1006/jmbi.2000.3903
- 623 23. Nielsen H, Engelbrecht J, Brunak S, von Heijne G. Identification of prokaryotic and  
624 eukaryotic signal peptides and prediction of their cleavage sites. *Protein*  
625 *Engineering*, 1997; 10: 1-6.
- 626 24. Krogh A, Larsson B, Heijne G, Sonnhammer ELL. Predicting transmembrane  
627 protein topology with a hidden Markov model: application to complete genomes.  
628 *Journal of molecular biology*. 2001; 305: 567-580. doi: 10.1006/jmbi.2000.4315

- 629 25. Ferre F, Clote P. DiANNA: a web server for disulfide connectivity prediction.  
630 Nucleic Acids Research. 2005; 33: W230-W232. doi: 10.1093/nar/gki412
- 631 26. Ferre F, Clote P. Disulfide connectivity prediction using secondary structure  
632 information and diresidue frequencies. Bioinformatics. 2005; 21: 2336–2346. doi:  
633 10.1093/bioinformatics/bti328
- 634 27. Ferrè F, Clote P. DiANNA 1.1: an extension of the DiANNA web server for ternary  
635 cysteine classification. Nucleic acids research. 2006; 34: W182-5. doi:  
636 10.1093/nar/gkl189
- 637 28. Hruz T, Laule O, Szabo G, Wessendorp F, Bleuler S, Oertle L, *et al.*  
638 Genevestigator v3: a reference expression database for the meta-analysis of  
639 transcriptomes. Advances in bioinformatics. 2008; 2008: 420747. doi:  
640 10.1155/2008/420747
- 641 29. Yoo S-D, Cho Y-H, Sheen J. *Arabidopsis* mesophyll protoplasts: a versatile cell  
642 system for transient gene expression analysis. Nature protocols. 2007; 2: 1565-  
643 1572. doi: 10.1038/nprot.2007.199
- 644 30. Gleason C, Huang S, Thatcher LF, Foley RC, Anderson CR, Carroll A, *et al.*  
645 Mitochondrial complex II has a key role in mitochondrial-derived reactive oxygen  
646 species influence on plant stress gene regulation and defense. Proceedings of the  
647 National Academy of Sciences. 2011; 108: 10768-10773. doi:  
648 10.1073/pnas.1016060108
- 649 31. Schindelin J, Arganda-Carreras I, Frise E, Kaynig V, Longair M, Pietzsch T, *et al.*  
650 Fiji: an open-source platform for biological-image analysis. Nature Methods. 2012;  
651 9: 676-682. doi: 10.1038/nmeth.2019

- 652 32. Wang P, Du Y, Zhao X, Miao Y, Song C-PP. The MPK6-ERF6-ROS-responsive  
653 cis-acting Element7/GCC box complex modulates oxidative gene transcription and  
654 the oxidative response in *Arabidopsis*. *Plant physiology*. 2013; 161: 1392-1408.  
655 doi: 10.1104/pp.112.210724
- 656 33. Petrov V, Vermeirssen V, De Clercq I, Van Breusegem F, Minkov I, Vandepoele  
657 K, *et al.* Identification of cis-regulatory elements specific for different types of  
658 reactive oxygen species in *Arabidopsis thaliana*. *Gene*. 2012; 499: 52-60. doi:  
659 10.1016/j.gene.2012.02.035
- 660 34. Steinebrunner I, Landschreiber M, Krause-Buchholz U, Teichmann J, Rödel G.  
661 HCC1, the *Arabidopsis* homologue of the yeast mitochondrial copper chaperone  
662 SCO1, is essential for embryonic development. *Journal of experimental botany*.  
663 2011; 62: 319-330. doi: 10.1093/jxb/erq269
- 664 35. Zavodnik IB, Dremza IK, Cheshchevik VT, Lapshina EA, Zamaraewa M. Oxidative  
665 damage of rat liver mitochondria during exposure to t-butyl hydroperoxide. Role of  
666 Ca<sup>2+</sup> ions in oxidative processes. *Life Sciences*. 2013; 92: 11101117. doi:  
667 10.1016/j.lfs.2013.04.009
- 668 36. Pham NA, Robinson BH, Hedley DW. Simultaneous detection of mitochondrial  
669 respiratory chain activity and reactive oxygen in digitonin-permeabilized cells using  
670 flow cytometry. *Cytometry*. 2000; 41: 245-251. doi: 10.1002/1097-  
671 0320(20001201)41:4<245::AID-CYTO2>3.0.CO;2-#
- 672 37. Vaahtera L, Brosche M, Wrzaczek M, Kangasjarvi J. Specificity in ROS Signaling  
673 and Transcript Signatures. *Antioxidants & Redox Signaling*. 2014; 21: 1422-1441.  
674 doi: 10.1089/ars.2013.5662

- 675 38. Steinebrunner I, Gey U, Andres M, Garcia L, Gonzalez DH. Divergent functions of  
676 the *Arabidopsis* mitochondrial SCO proteins: HCC1 is essential for COX activity  
677 while HCC2 is involved in the UV-B stress response. *Frontiers in plant science*.  
678 2014; 5: 87. doi: 10.3389/fpls.2014.00087
- 679 39. Attallah CV, Welchen E, Martin AP, Spinelli SV, Bonnard G, Palatnik JF, *et al.*  
680 Plants contain two SCO proteins that are differentially involved in cytochrome c  
681 oxidase function and copper and redox homeostasis. *Journal of experimental*  
682 *botany*. 2011; 62: 4281-4294. doi: 10.1093/jxb/err138
- 683 40. Ng S, Giraud E, Duncan O, Law SR, Wang Y, Xu L, *et al.* Cyclin-dependent kinase  
684 E1 (CDKE1) provides a cellular switch in plants between growth and stress  
685 responses. *Journal of Biological Chemistry*. 2013; 288: 3449-3459. doi:  
686 10.1074/jbc.M112.416727
- 687 41. Cocheme HM, Murphy MP. Complex I is the major site of mitochondrial superoxide  
688 production by paraquat. *Journal of Biological Chemistry*. 2008; 283: 1786-1798.  
689 doi: 10.1074/jbc.M708597200
- 690 42. Sedigheh HG, Mortazavian M, Norouzian D, Atyabi M, Akbarzadeh A, Hasanpoor  
691 K, *et al.* Oxidative stress and leaf senescence. *BMC Research Notes*. 2011; 4:  
692 477. doi: 10.1186/1756-0500-4-477
- 693 43. Sturtz LA, Diekert K, Jensen LT, Lill R, Culotta VC. A fraction of yeast Cu,Zn-  
694 superoxide dismutase and its metallochaperone, CCS, localize to the  
695 intermembrane space of mitochondria. A physiological role for SOD1 in guarding  
696 against mitochondrial oxidative damage. *Journal of Biological Chemistry*. 2001;  
697 276: 38084-38089. doi: 10.1074/jbc.M105296200

- 698 44. Criddle DN, Gillies S, Baumgartner-Wilson HK, Jaffar M, Chinje EC, Passmore S,  
699 *et al.* Menadione-induced reactive oxygen species generation via redox cycling  
700 promotes apoptosis of murine pancreatic acinar cells. *Journal of Biological*  
701 *Chemistry*. 2006; 281: 40485-40492. doi: 10.1074/jbc.M607704200
- 702 45. Thompson AK, Smith D, Gray J, Carr HS, Liu A, Winge DR *et al.* Mutagenic  
703 analysis of Cox11 of *Rhodobacter sphaeroides*: insights into the assembly of Cu(B)  
704 of cytochrome c oxidase. *Biochemistry*. 2010; 49: 5651-5661. doi:  
705 10.1021/bi1003876
- 706 46. Gadjev I, Vanderauwera S, Gechev TS, Laloi C, Minkov IN, Shulaev V, *et al.*  
707 Transcriptomic footprints disclose specificity of reactive oxygen species signaling  
708 in *Arabidopsis*. *Plant Physiology*. 2006; 141: 436-445. doi: 10.1104/pp.106.078717
- 709 47. Fukui H, Diaz F, Garcia S, Moraes CT. Cytochrome c oxidase deficiency in  
710 neurons decreases both oxidative stress and amyloid formation in a mouse model  
711 of Alzheimer's disease. *Proceedings of the National Academy of Sciences*. 2007;  
712 104: 14163-14168. doi: 10.1073/pnas.0705738104
- 713 48. Diaz F, Fukui H, Garcia S, Moraes CT. Cytochrome c oxidase is required for the  
714 assembly/stability of respiratory complex I in mouse fibroblasts. *Molecular and*  
715 *cellular biology*. 2006; 26: 4872-4881. doi: 10.1128/MCB.01767-05
- 716 49. Suthammarak W, Yang Y-Y, Morgan PG, Sedensky MM. Complex I function is  
717 defective in complex IV-deficient *Caenorhabditis elegans*. *Journal of Biological*  
718 *Chemistry*. 2009; 284: 6425-6435. doi: 10.1074/jbc.M805733200



- 719 50. Maxwell DP, Wang Y, McIntosh L. The alternative oxidase lowers mitochondrial  
720 reactive oxygen production in plant cells. Proceedings of the National Academy of  
721 Sciences. 1999; 96: 8271-8276. doi: 10.1073/pnas.96.14.8271
- 722 51. Bode M, Woellhaf MW, Bohnert M, Laan M, Sommer F, Jung M, *et al.* Redox-  
723 regulated dynamic interplay between Cox19 and the copper-binding protein Cox11  
724 in the intermembrane space of mitochondria facilitates biogenesis of cytochrome  
725 c oxidase. Molecular biology of the cell. 2015; 26: 2385-401. doi:  
726 10.1091/mbc.E14-11-1526
- 727 52. Banci L, Bertini I, Cantini F, Ciofi-Baffoni S, Gonnelli L, Mangani S. Solution  
728 structure of Cox11, a novel type of beta-immunoglobulin-like fold involved in CuB  
729 site formation of cytochrome c oxidase. The Journal of biological chemistry. 2004;  
730 279: 34833-34839. doi: 10.1074/jbc.M403655200
- 731 53. Van Dijk AD, Ciofi-Baffoni S, Banci L, Bertini I, Boelens R, Bonvin A. Modeling  
732 protein-protein complexes involved in the cytochrome C oxidase copper-delivery  
733 pathway. Journal of proteome research. 2007; 6: 1530-1539. doi:  
734 10.1021/pr060651f

735

## 736 **Supporting information**

737 **S1 Fig. Cis-acting putative ROS-response elements in the putative promoter**  
738 **regions of *AtCOX11*, *AtHCC1* and *AtHCC2*.**

739 **S2 Fig. Total cell fluorescence intensity distributions of *ScCOX11* knock-out (A, B,**  
740 **C) and overexpressing yeast (D, E, F) cells stained with DCFDA.**

741 **S3 Fig. Alignment of *A. thaliana* (*A. t.*) and *S. cerevisiae* (*S. c.*) COX11 protein**  
742 **sequences.**

743 **S1 Table. Cloning primers**

744 **S2 Table. Primers used for qPCR.**

745 **S3 Table. Absolute and normalized values from bar graphs and descriptive**  
746 **statistics.**

747 **S4 Table. Gene regulation in response to 50  $\mu$ M antimycin A (microarray data**  
748 **from Ng *et al.* [2013], Genevestigator).**

749

750

751

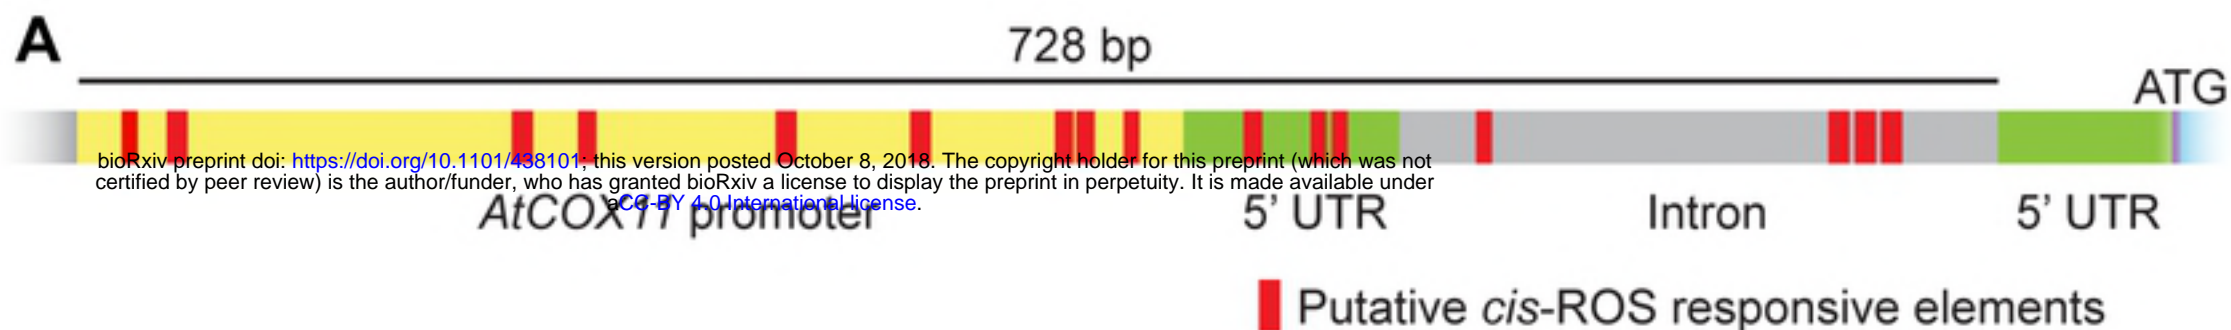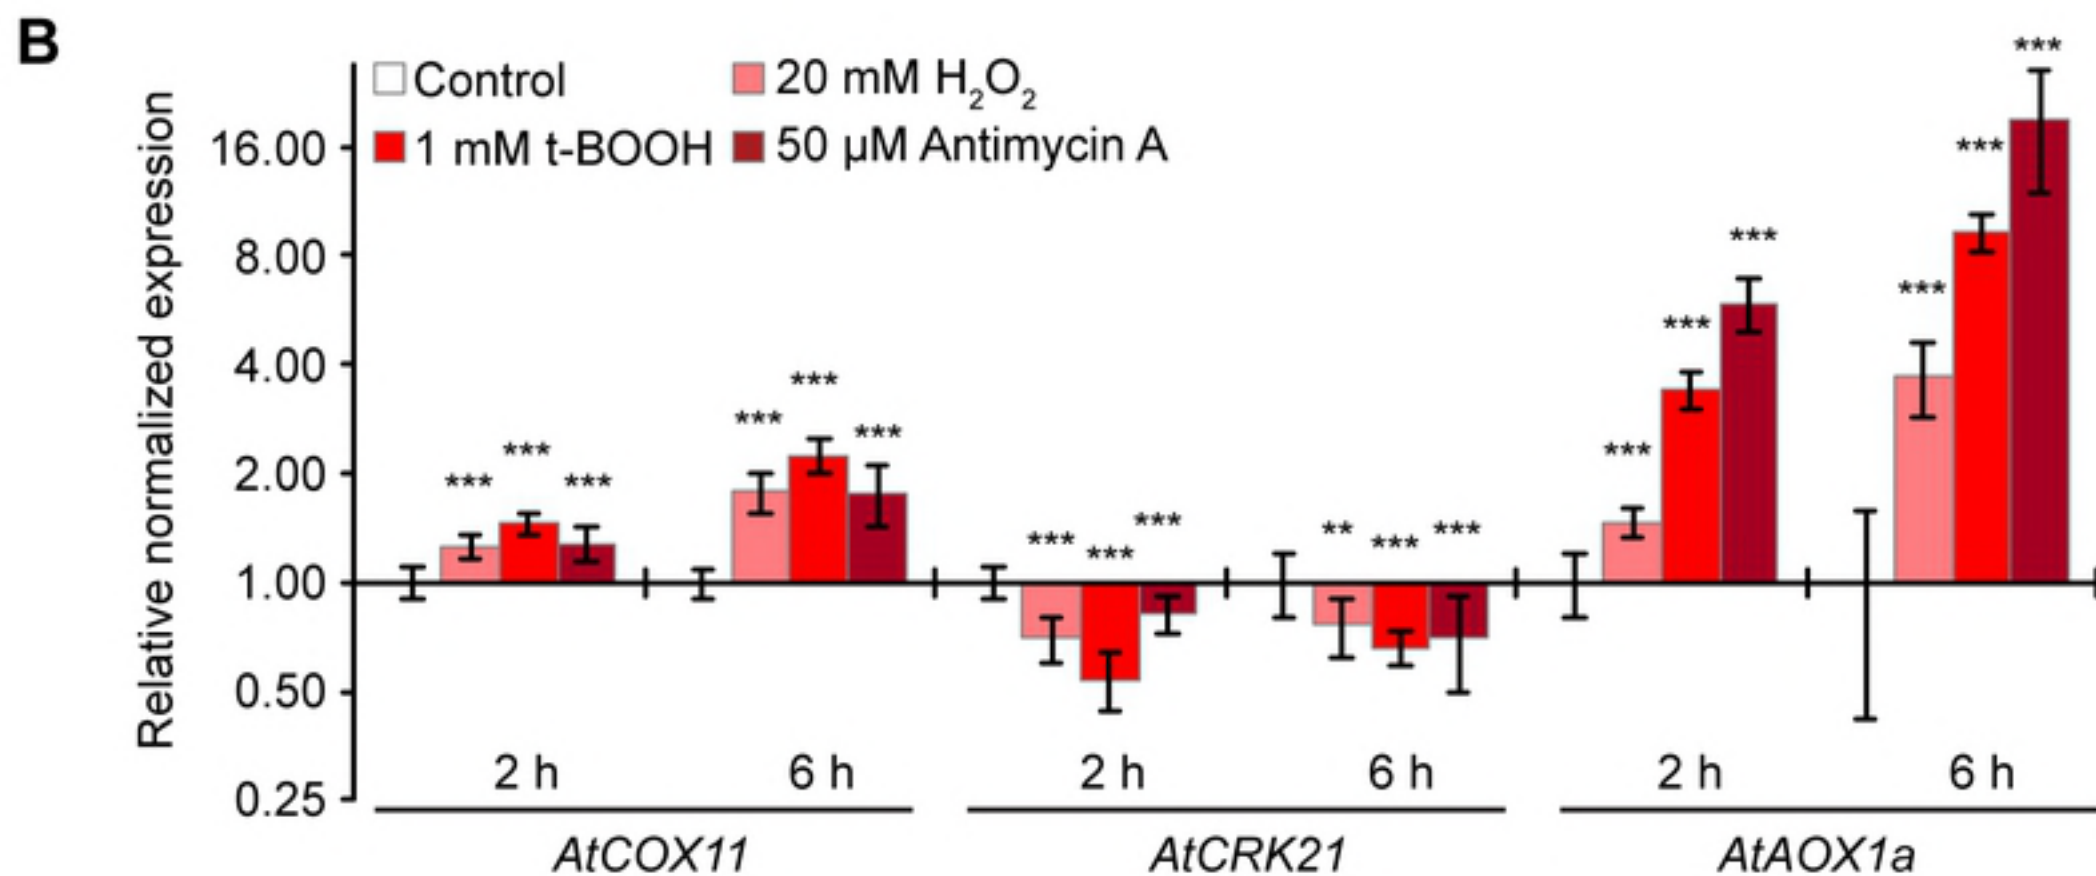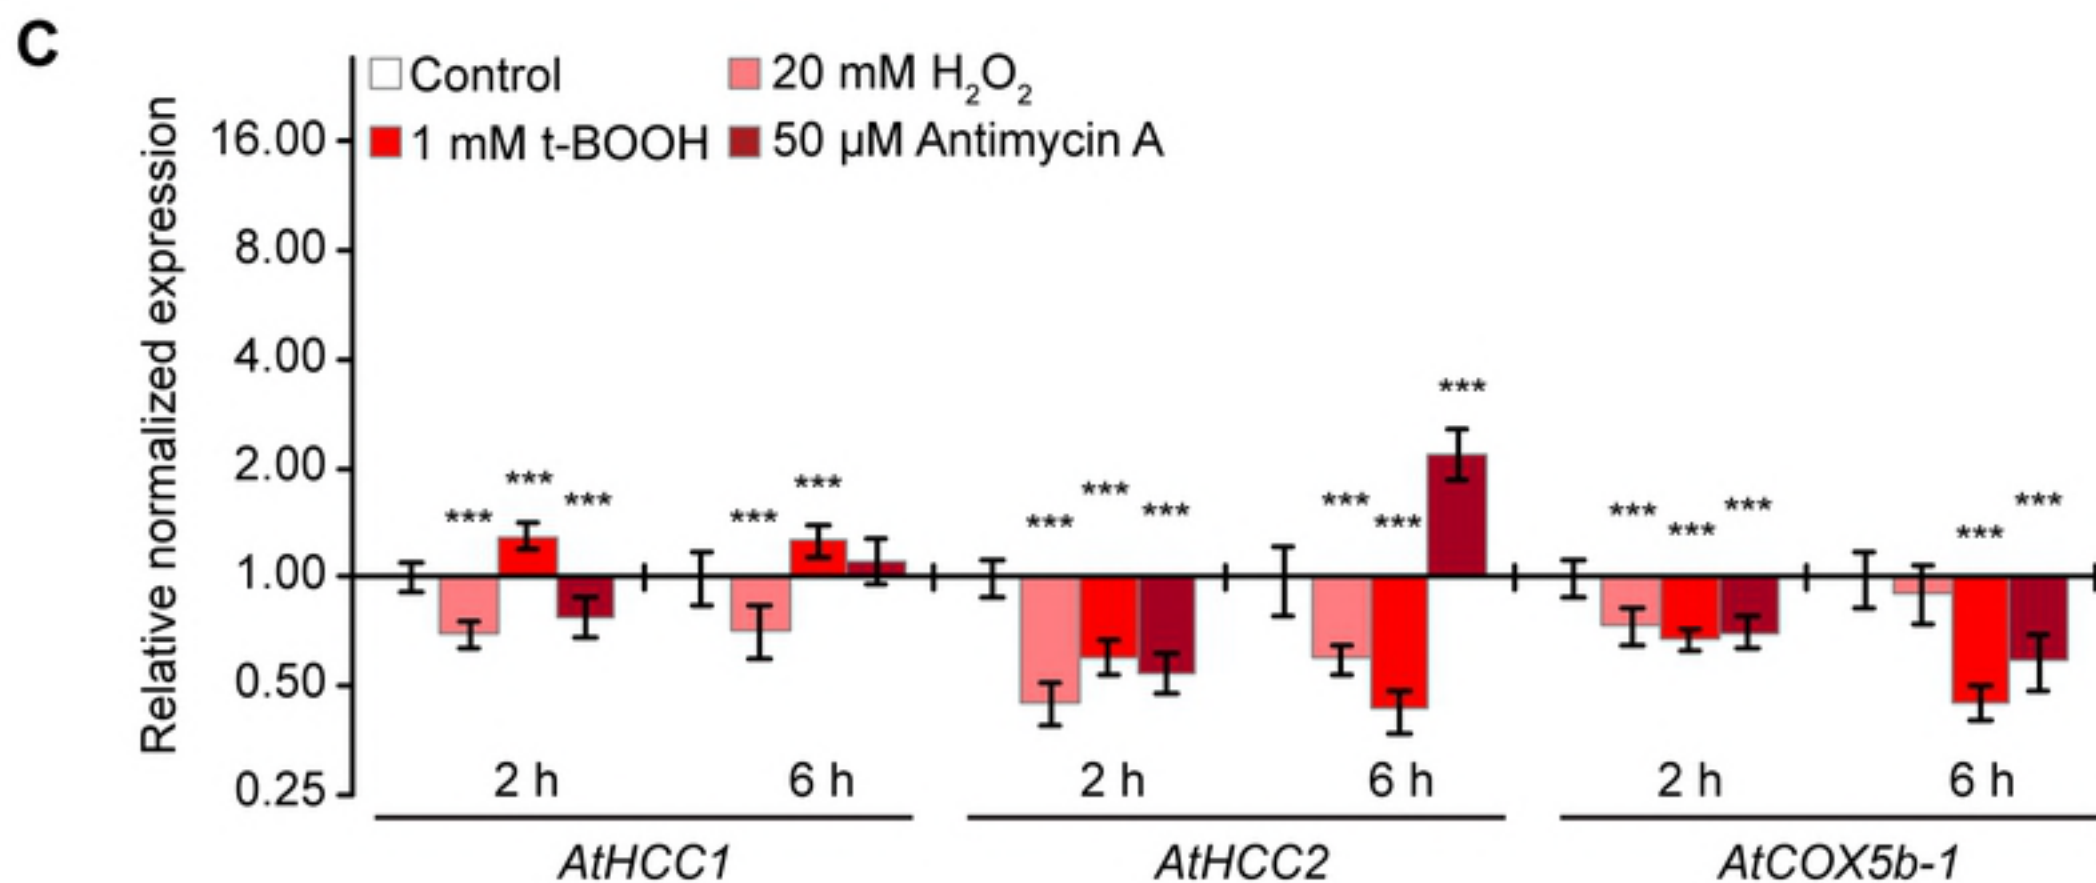

**A**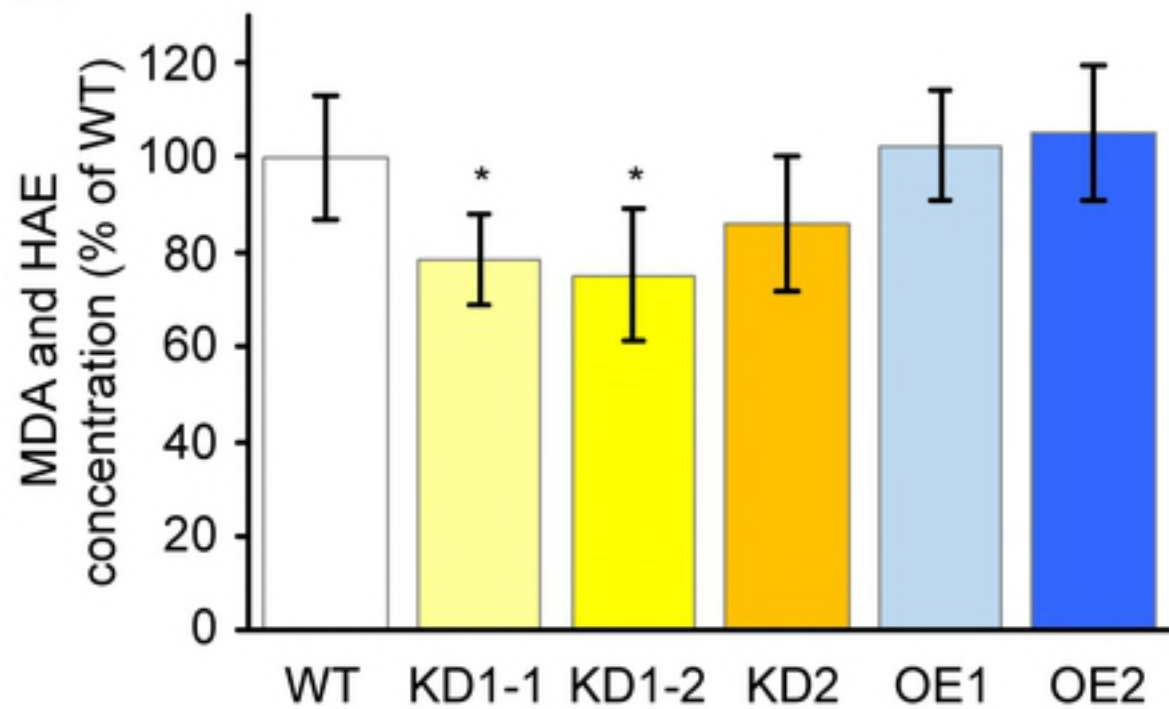**B**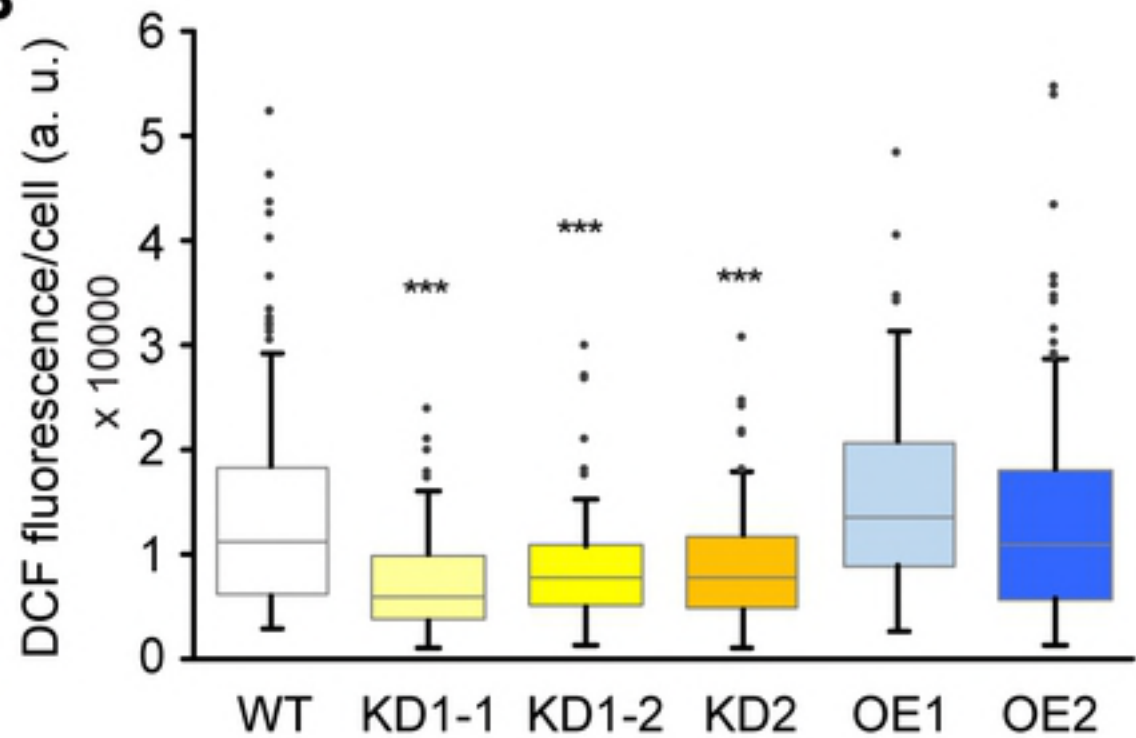

**A**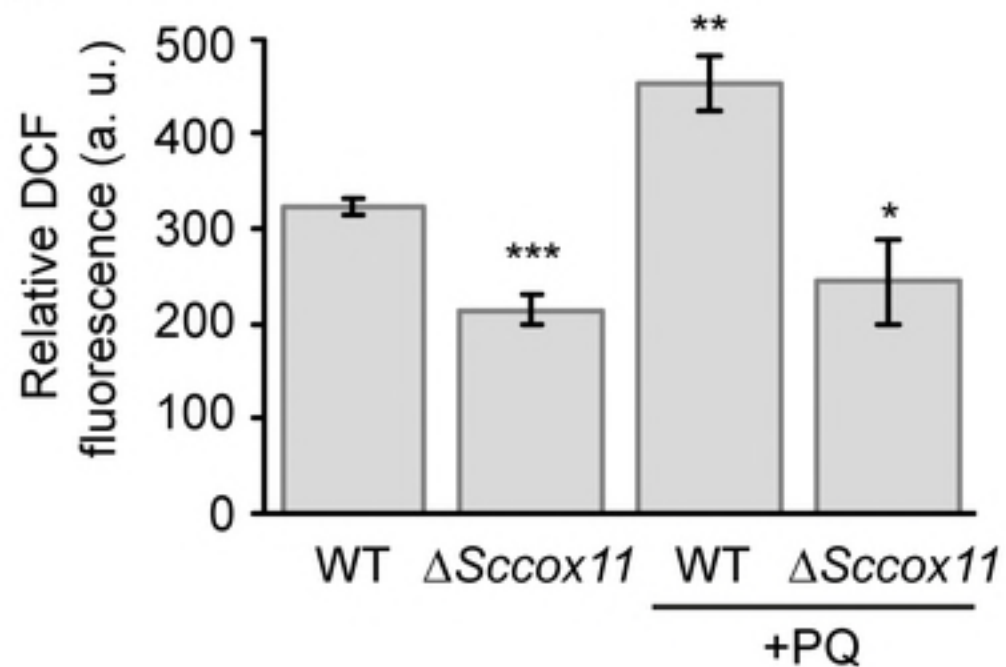**B**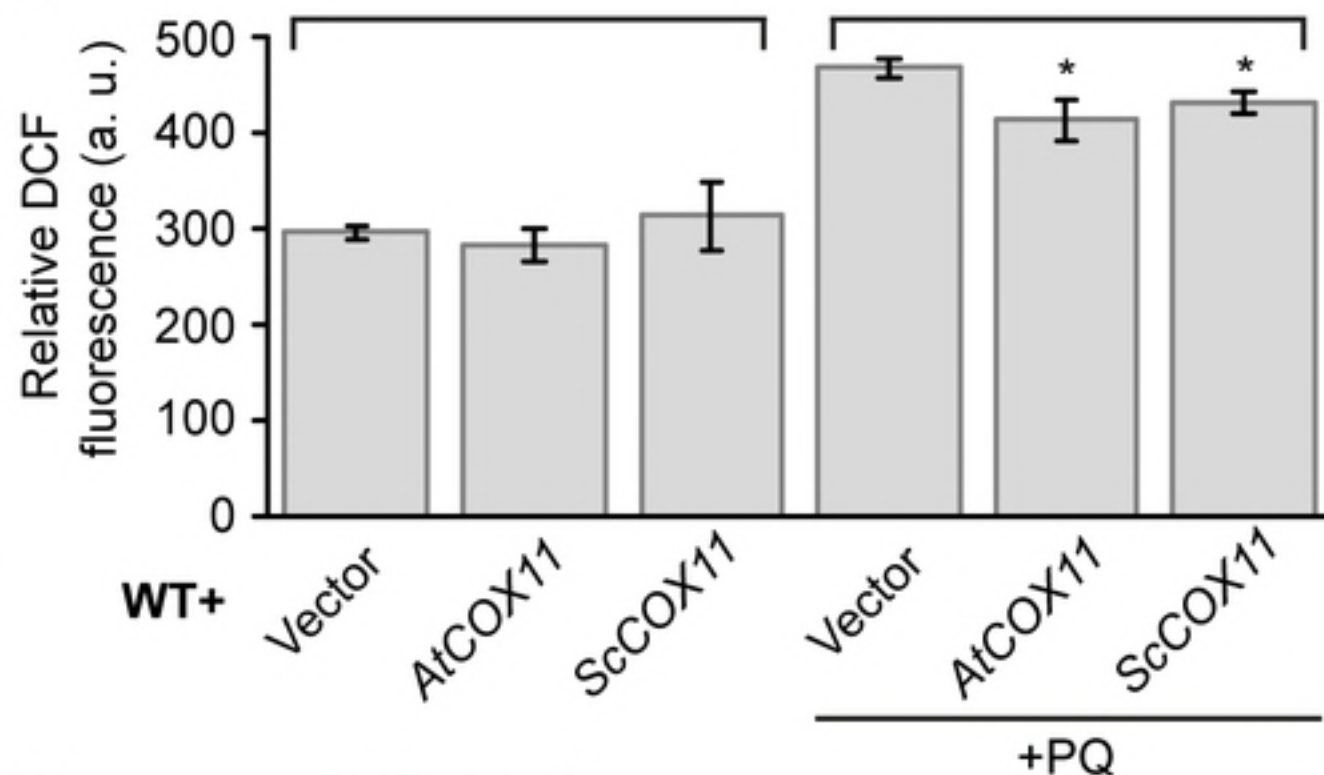**C**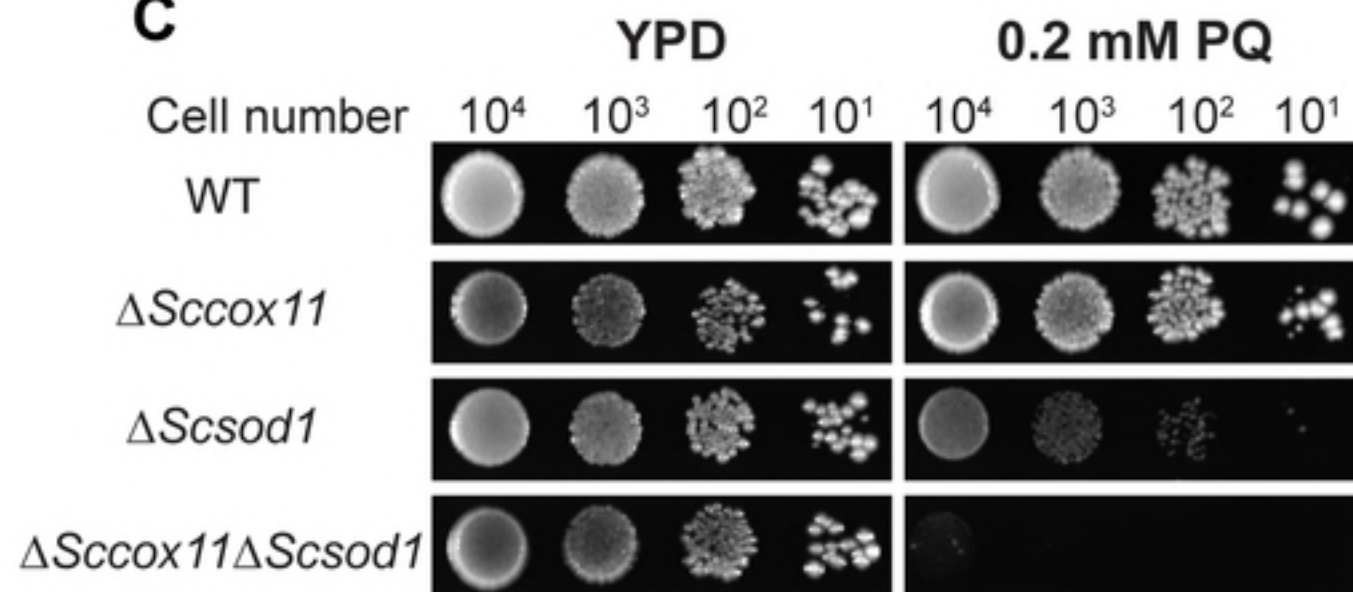

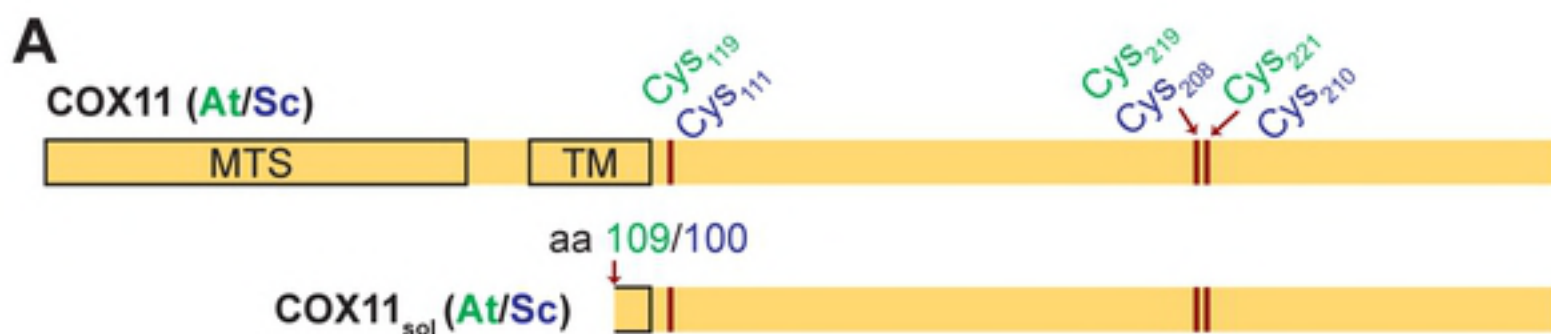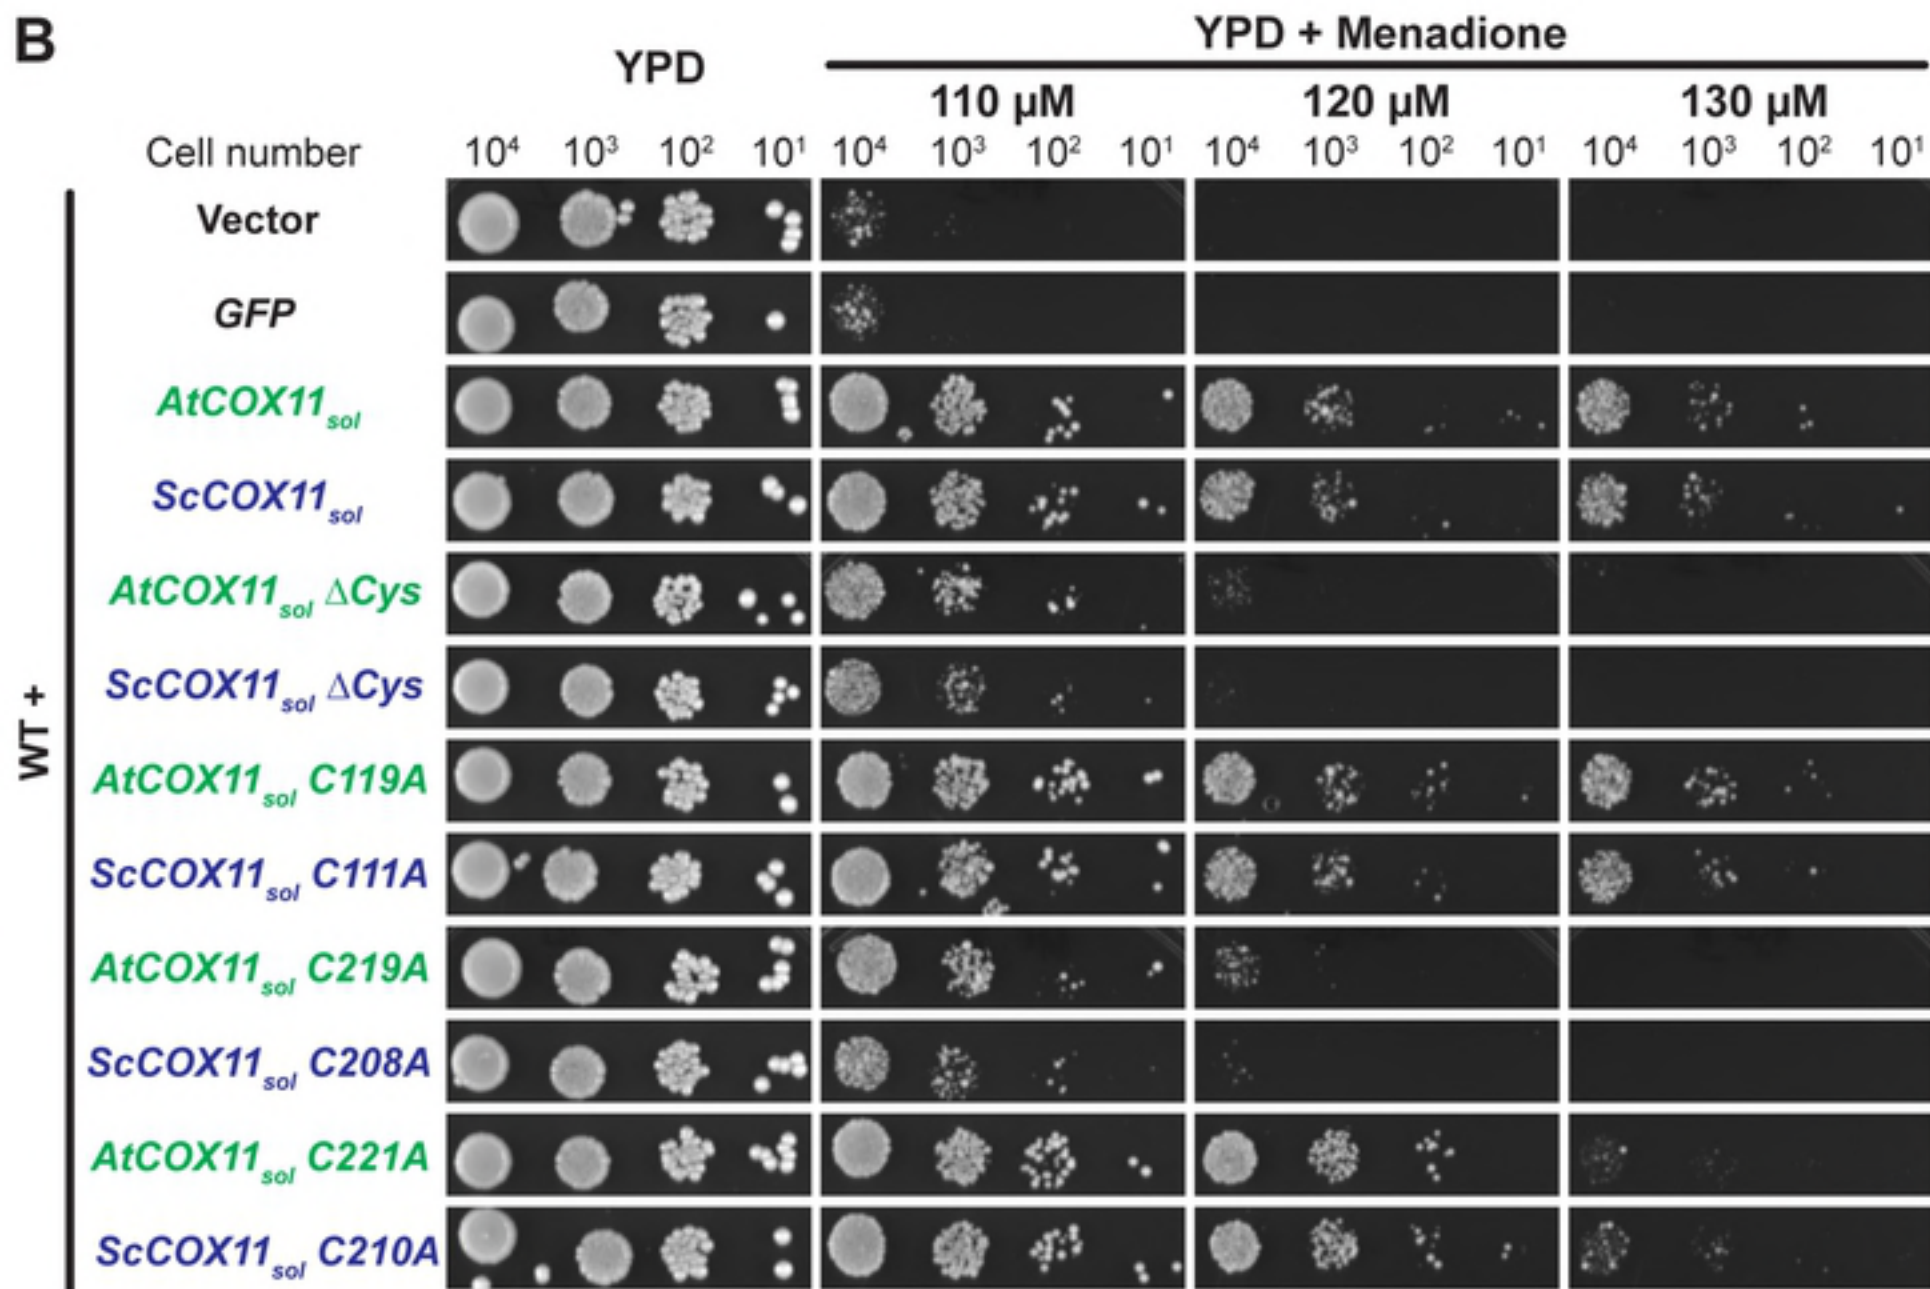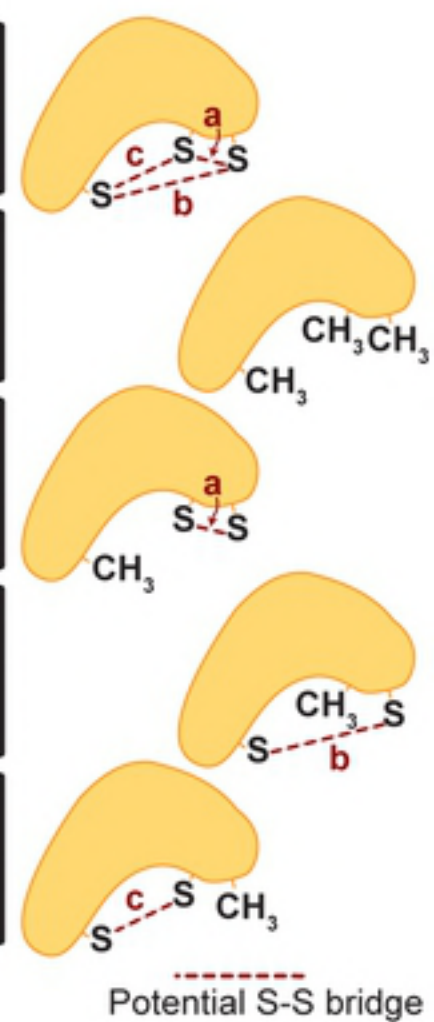

Source: https://www.biorxiv.org/content/10.1101/438101v1.full.pdf
